# Supplementary material for: Flow cytometric microsphere-based immunoassay as a novel non-radiometric method for the detection of glutamic acid decarboxylase autoantibodies in type 1 diabetes mellitus
Source: Royal Society of Chemistry journal article supplement (doi:10.1039/c3an02243a), 2014-01-01
Supplement: c3an02243a1.pdf [file c3an02243a1.pdf]

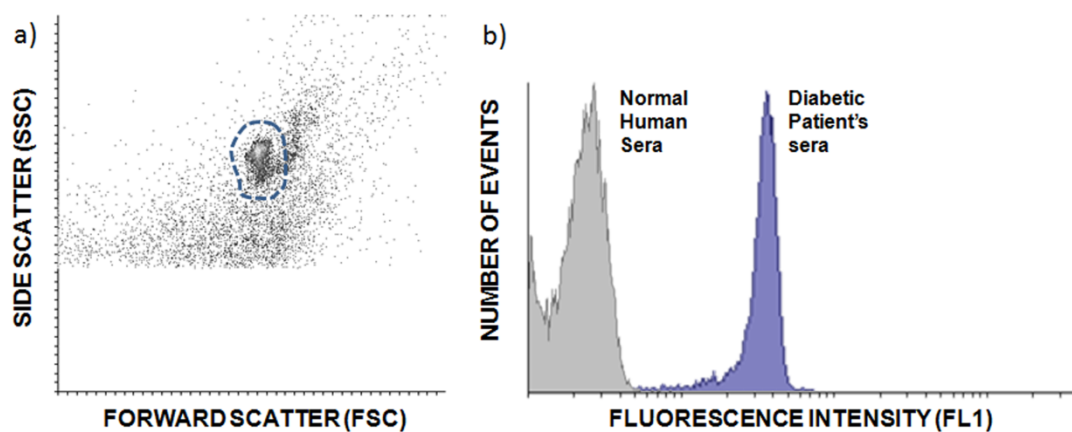

Electronic Supplementary Figure 1. **Four  $\mu\text{m}$  microspheres-TrxGAD65 set.** Population of microspheres seen in FSC vs. SSC dot plot for gating purposes (a), and FL1 vs. number of events histogram (b), for measuring of fluorescence (representative signals from normal human serum and diabetic patient's serum are shown).

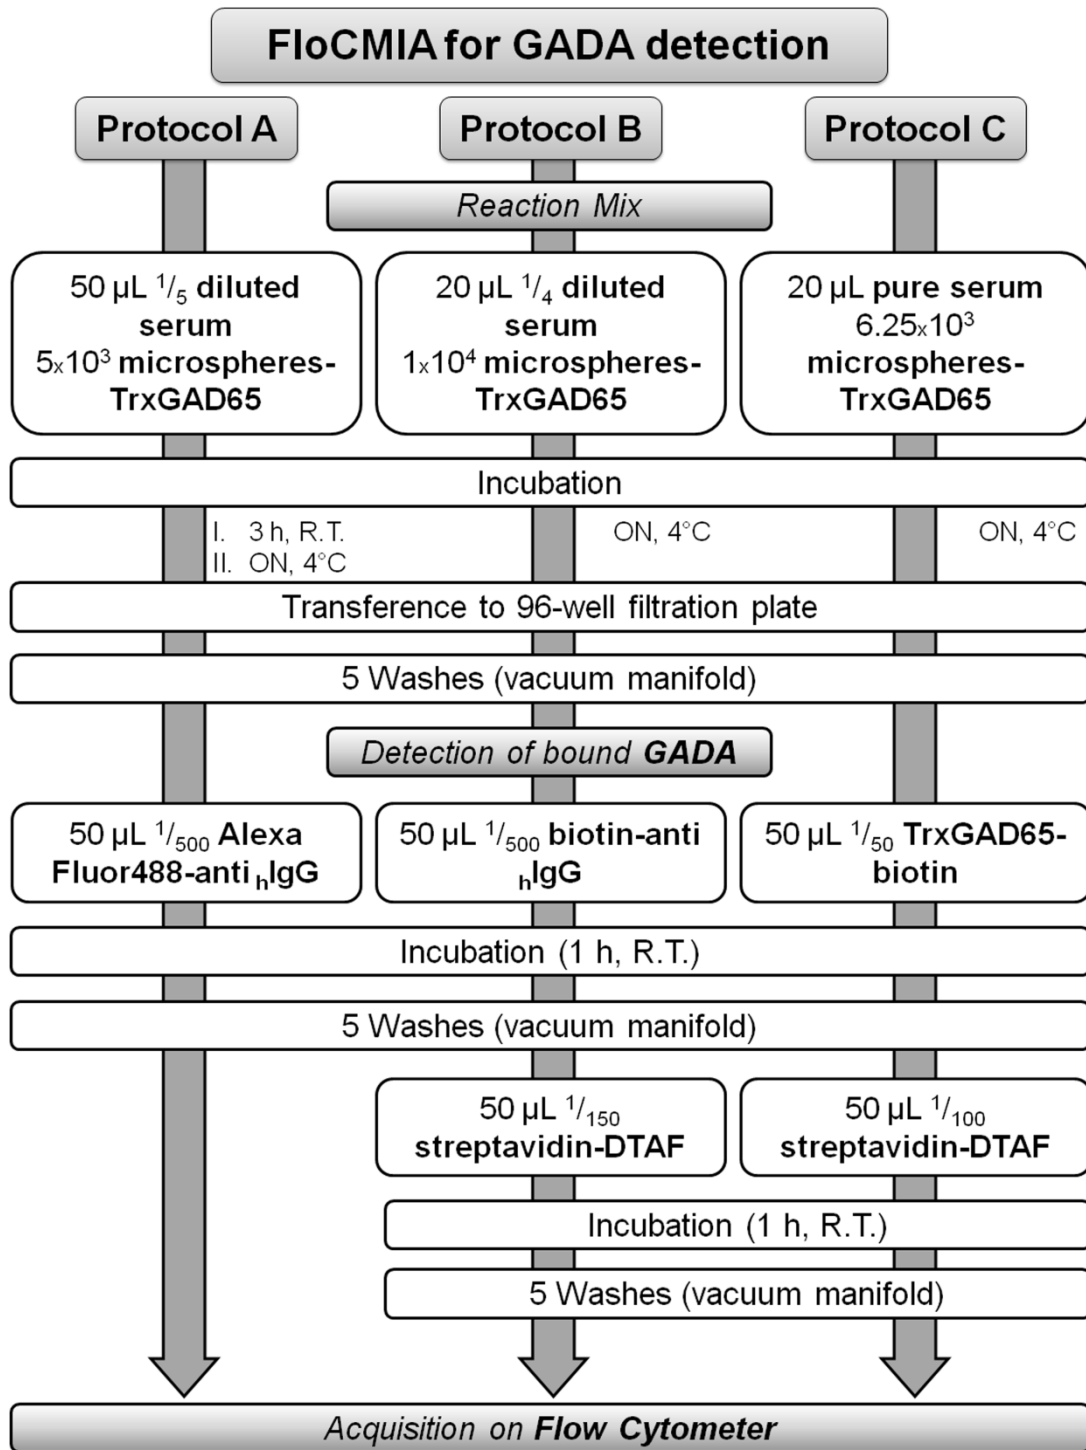

Electronic Supplementary Figure 2. **Flowchart of experimental protocols for FloCMIA A, B and C.**
